# Supplementary material for: Lactobacillus plantarum (LPsca12) enhances growth phenotype and muscle nutrition in abalone (Haliotis discus hannai) by modulating microbial function and metabolism through the Amino Acid-Driven Gut-Muscle Axis
Source: Research Square preprint supplement (doi:10.21203/rs.3.rs-7232881/v1), 2025-10-03
Supplement: Supplementary file 1 [file d2126262b2a4dff7529d2295.docx]

**Table S1** Overview of the feed types included and the main differences

| Ingredient |  | Pro | Con |
| --- | --- | --- | --- |
| Core feed composition | Protein content(%)(SD ± 1.01) | 30 | 30 |
| Fat content(%)(SD ± 1.46) | 26 | 26 |
| S*argassum fusiforme* content(%)(SD ± 1.22) | 14 | 14 |
| Ash content(%)(SD ± 0.81) | 35 | 35 |
| Additives | *Lactobacillus plantarum* LPsca12(1× 1010 CFU/g) | + | - |

**
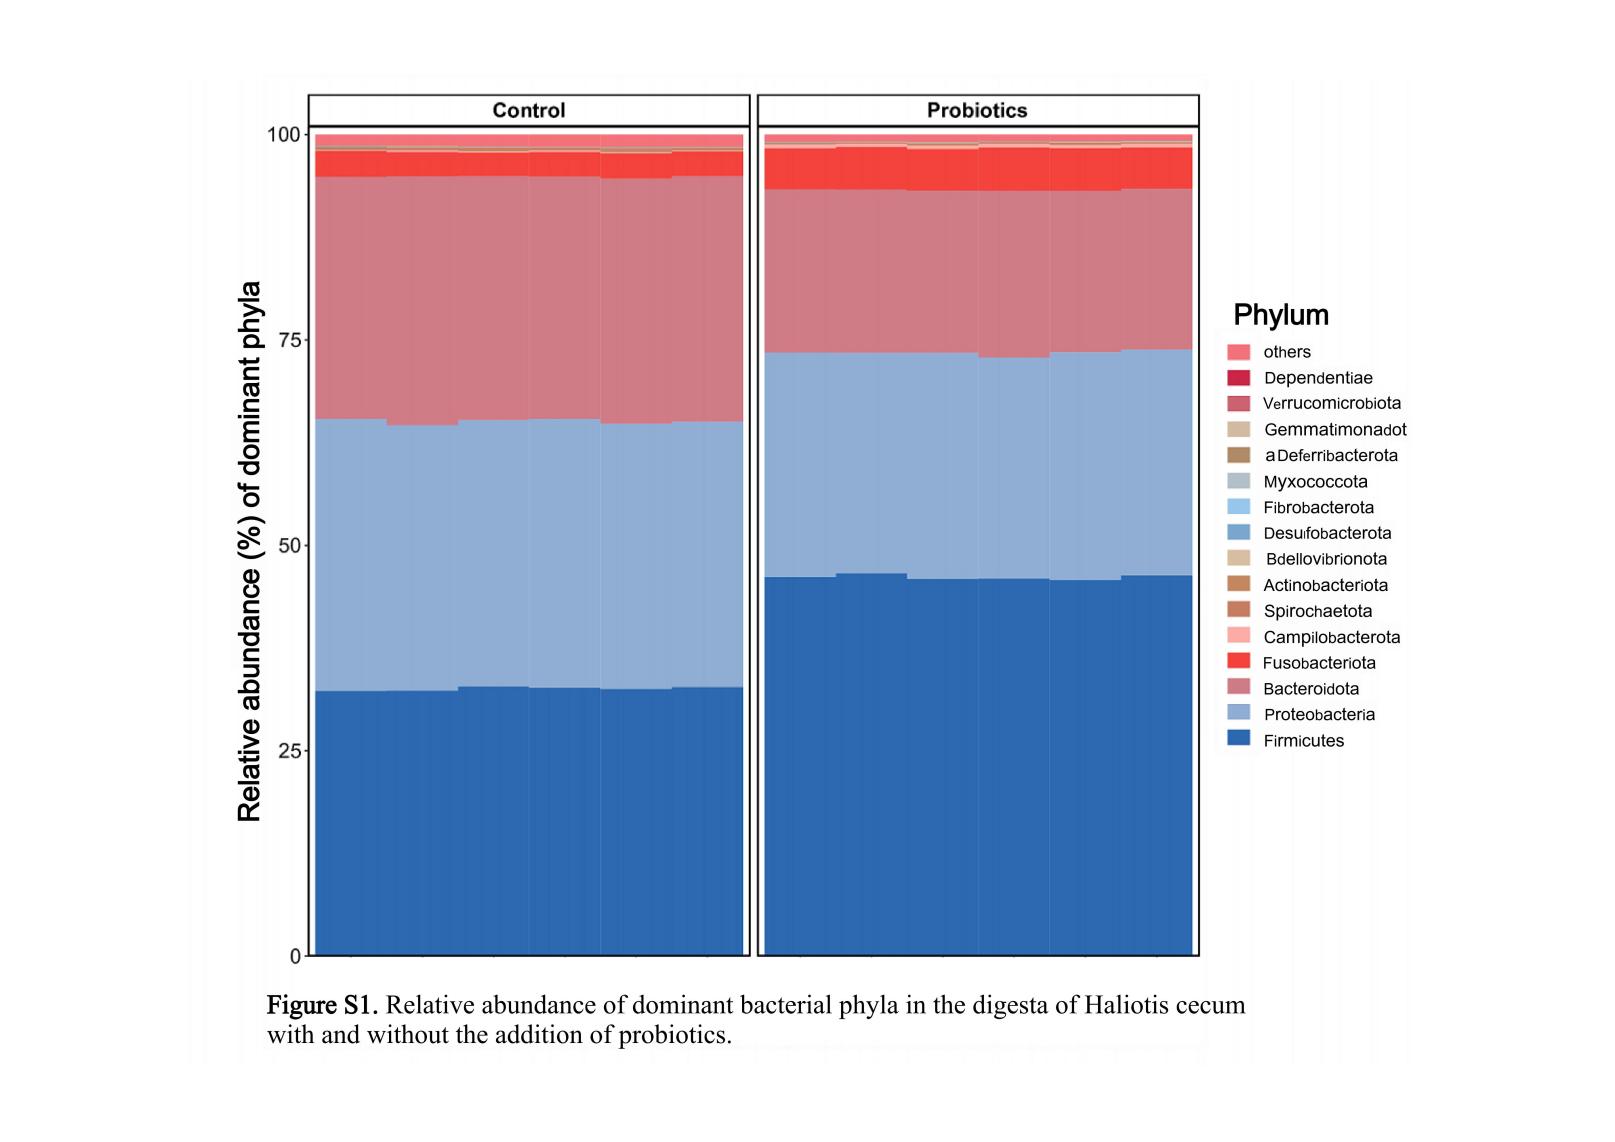
**

**
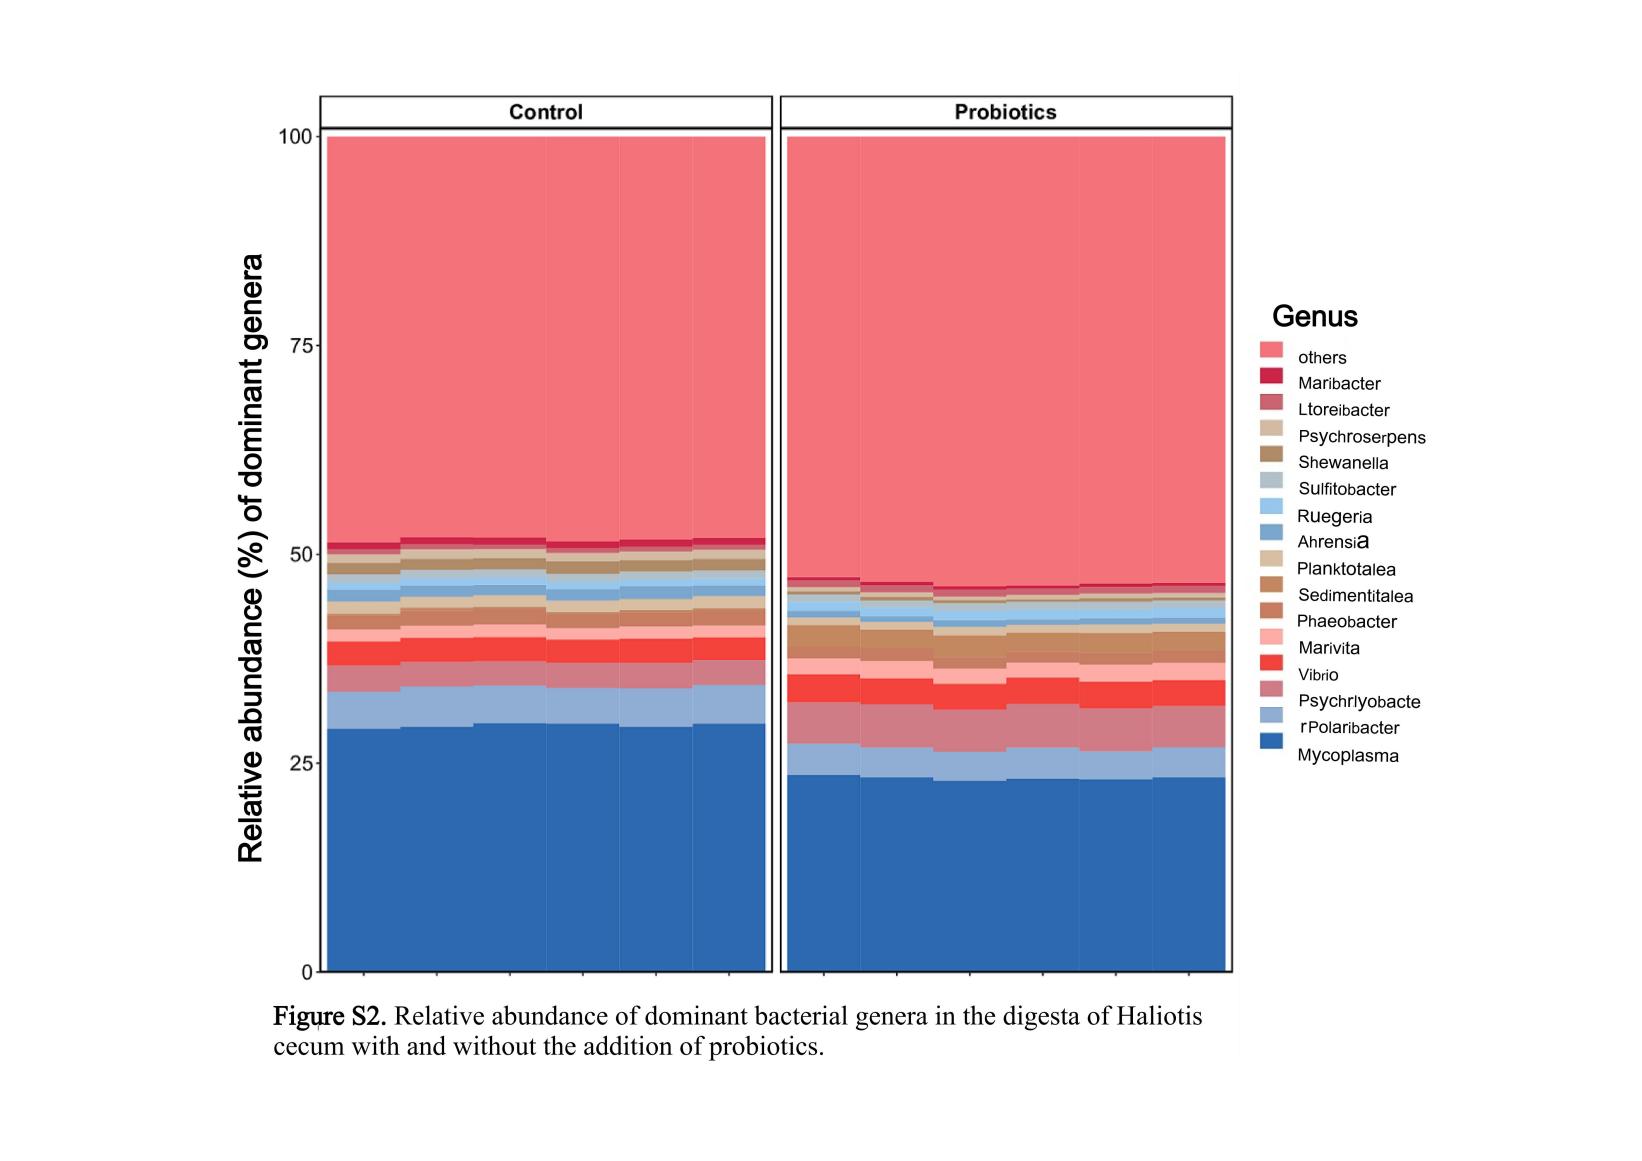
**

**
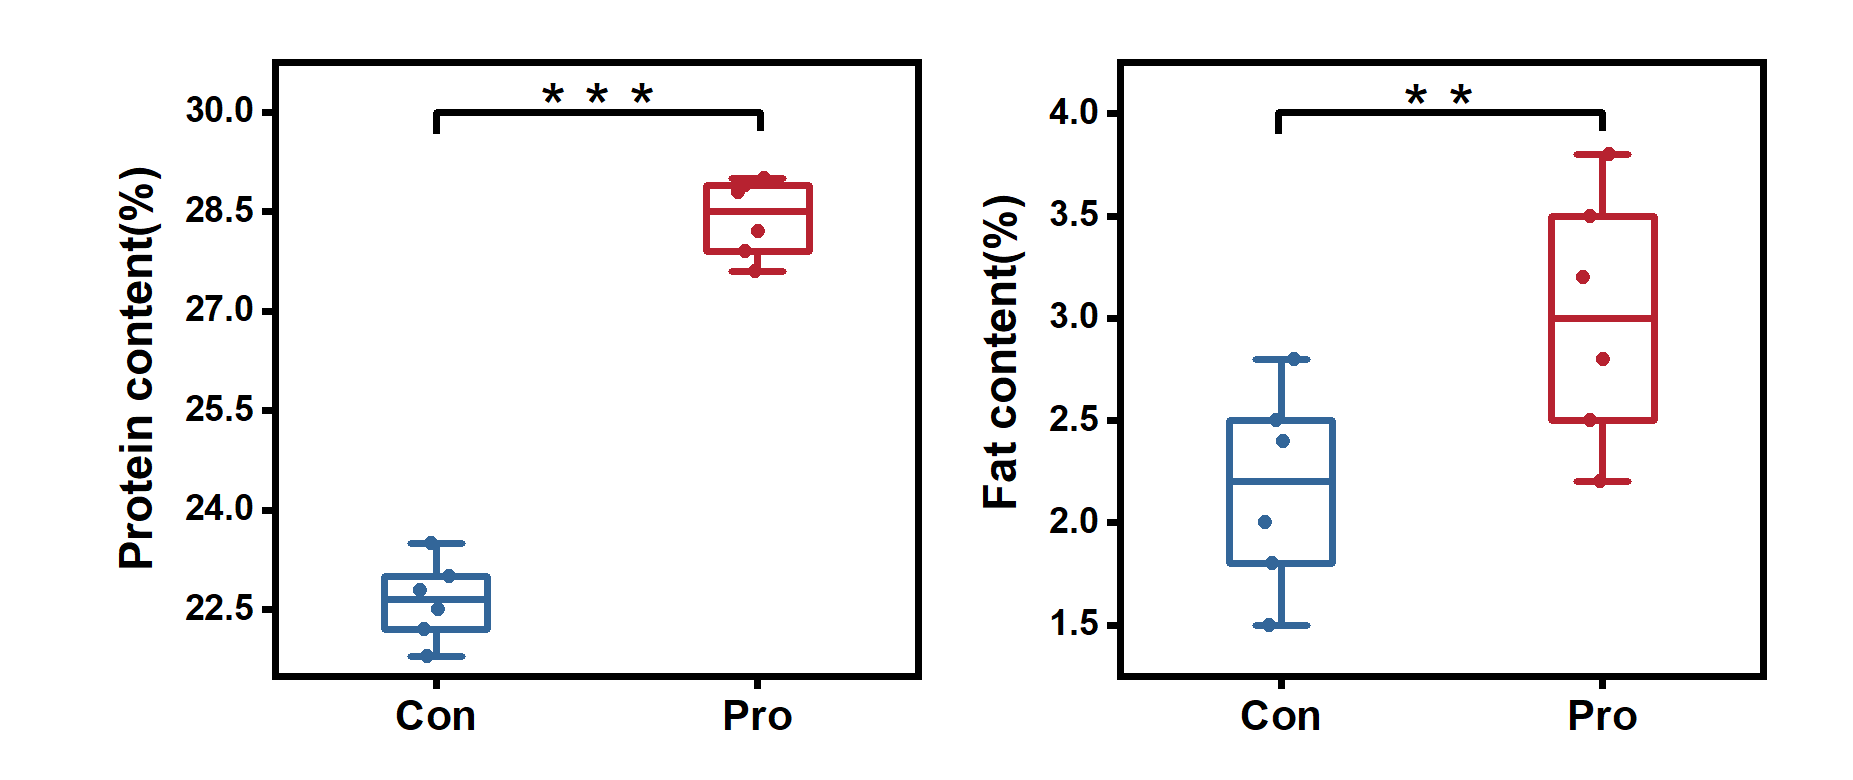
**

**Figure S3. Content of protein and ether compounds in abalone muscle**

**Table S2** Compisitions of AAs in gut

| Class | Count | Percent |
| --- | --- | --- |
| 5'-Deoxyribonucleosides | 1 | 1.02% |
| Benzene and Substituted Derivatives | 2 | 2.04% |
| Carboximidic Acids and Derivatives | 2 | 2.04% |
| Carboxylic Acids and Derivatives | 77 | 78.57% |
| Fatty Acyls | 1 | 1.02% |
| Indoles and Derivatives | 4 | 4.08% |
| Organonitrogen Compounds | 2 | 2.04% |
| Organooxygen Compounds | 2 | 2.04% |
| Peptidomimetics | 2 | 2.04% |
| Others | 5 | 5.1% |
